# Supplementary material for: Lymphocyte Gene Expression Signatures from Patients and Mouse Models of Hereditary Hemochromatosis Reveal a Function of HFE as a Negative Regulator of CD8+ T-Lymphocyte Activation and Differentiation In Vivo
Source: PubMed Central journal article supplement (PMC4399836; doi:10.1371/journal.pone.0124246), 2015-04-16
Supplement: pone.0124246.s003.pdf [file pone.0124246.s003.pdf]

**S2 Table Genes up and down regulated in *Hfe* knockout CD8<sup>+</sup> T lymphocytes in comparison with C57BL/6 mice under normal diet condition**

| Transcripts ID | Gene abbreviation | Gene name                                                                                             | Fold Change | p-value | Gene ID       |
|----------------|-------------------|-------------------------------------------------------------------------------------------------------|-------------|---------|---------------|
| 10493831       | S100a8            | S100 calcium binding protein A8 (calgranulin A)                                                       | 16,53       | 0,00    | 20201         |
| 10499861       | S100a9            | S100 calcium binding protein A9 (calgranulin B)                                                       | 12,96       | 0,00    | 20202         |
| 10362674       | Rnu3a             | U3A small nuclear RNA                                                                                 | 5,31        | 0,00    | 19850         |
| 10436100       | Retnlg            | resistin like gamma                                                                                   | 4,67        | 0,00    | 245195        |
| 10456005       | Cd74              | CD74 antigen (invariant polypeptide of major histocompatibility complex, class II antigen-associated) | 4,62        | 0,01    | 16149         |
| 10372648       | Lyz2              | lysozyme 2                                                                                            | 4,33        | 0,01    | 17105         |
| 10444291       | H2-Ab1            | histocompatibility 2, class II antigen A, beta 1                                                      | 3,75        | 0,01    | 14961         |
| 10493812       | S100a4            | S100 calcium binding protein A4                                                                       | 3,44        | 0,00    | 20198         |
| 10450154       | H2-Aa             | histocompatibility 2, class II antigen A, alpha                                                       | 3,35        | 0,01    | 14960         |
| 10570434       | Ifitm1            | interferon induced transmembrane protein 1                                                            | 3,12        | 0,00    | 68713         |
| 10551025       | Cd79a             | CD79A antigen (immunoglobulin-associated alpha)                                                       | 2,97        | 0,00    | 12518         |
| 10468517       | Mxi1              | Max interacting protein 1                                                                             | 2,90        | 0,03    | 17859         |
| 10512487       | Rmrp              | RNA component of mitochondrial RNAase P                                                               | 2,81        | 0,02    | 19782         |
| 10444236       | H2-DMb1/DMb2      | histocompatibility 2, class II, locus Mb1 and Mb2                                                     | 2,76        | 0,00    | 15000   14999 |
| 10508465       | Marcks1           | MARCKS-like 1                                                                                         | 2,68        | 0,00    | 17357         |
| 10551883       | Tyrobp            | TYRO protein tyrosine kinase binding protein                                                          | 2,63        | 0,02    | 22177         |
| 10508721       | Snora44           | small nucleolar RNA, H/ACA box 44                                                                     | 2,59        | 0,03    | 100217418     |
| 10550509       | Pglyrp1           | peptidoglycan recognition protein 1                                                                   | 2,50        | 0,00    | 21946         |
| 10360070       | Fcer1g            | Fc receptor, IgE, high affinity I, gamma polypeptide                                                  | 2,49        | 0,04    | 14127         |
| 10467979       | Scd1              | stearoyl-Coenzyme A desaturase 1                                                                      | 2,47        | 0,03    | 20249         |
| 10429520       | Ly6d              | lymphocyte antigen 6 complex, locus D                                                                 | 2,40        | 0,03    | 17068         |
| 10538871       | Gm4964            | predicted gene 4964                                                                                   | 2,37        | 0,04    | 243420        |
| 10440576       | Rnf160            | ring finger protein 160                                                                               | 2,36        | 0,00    | 78913         |
| 10392142       | Cd79b             | CD79B antigen                                                                                         | 2,20        | 0,01    | 15985         |
| 10558769       | Ifitm1            | interferon induced transmembrane protein 1                                                            | 2,19        | 0,01    | 68713         |
| 10379727       | Gm11428           | predicted gene 11428                                                                                  | 2,10        | 0,03    | 100034251     |
| 10414262       | Ear2              | eosinophil-associated, ribonuclease A family, member 2                                                | 2,08        | 0,03    | 13587         |
| 10349593       | Faim3             | Fas apoptotic inhibitory molecule 3                                                                   | 2,06        | 0,00    | 69169         |
| 10548817       | Plbd1             | phospholipase B domain containing 1                                                                   | 2,04        | 0,05    | 66857         |
| 10466172       | Ms4a1             | membrane-spanning 4-domains, subfamily A, member 1                                                    | 1,99        | 0,05    | 12482         |
| 10548535       | Klra3             | killer cell lectin-like receptor, subfamily A, member 3                                               | 1,97        | 0,03    | 16634         |
| 10430818       | Tnfrsf13c         | tumor necrosis factor receptor superfamily, member 13c                                                | 1,97        | 0,01    | 72049         |
| 10556113       | Rbm3              | RNA binding motif protein 3                                                                           | 1,95        | 0,00    | 19652         |
| 10481627       | Lcn2              | lipocalin 2                                                                                           | 1,91        | 0,00    | 16819         |
| 10535458       | Zdhhc4            | zinc finger, DHHC domain containing 4                                                                 | 1,89        | 0,03    | 72881         |
| 10563338       | Ppp1r15a          | protein phosphatase 1, regulatory (inhibitor) subunit 15A                                             | 1,87        | 0,03    | 17872         |
| 10422227       | Spry2             | sprouty homolog 2 (Drosophila)                                                                        | 1,86        | 0,04    | 24064         |
| 10398286       | Mir342            | microRNA 342                                                                                          | -4,69       | 0,01    | 723909        |
| 10515694       | Szt2              | seizure threshold 2                                                                                   | -3,04       | 0,02    | 230676        |
| 10503198       | Chd7              | chromodomain helicase DNA binding protein 7                                                           | -3,02       | 0,01    | 320790        |
| 10405779       | Mir23b            | microRNA 23b                                                                                          | -2,78       | 0,03    | 387217        |
| 10456490       | Cep192            | centrosomal protein 192                                                                               | -2,66       | 0,02    | 70799         |
| 10512827       | Gm568             | predicted gene 568                                                                                    | -2,50       | 0,03    | 230143        |
| 10351043       | Snord47           | small nucleolar RNA, C/D box 47                                                                       | -2,50       | 0,02    | 100217446     |
| 10410311       | Zfp456            | zinc finger protein 456                                                                               | -2,43       | 0,02    | 408065        |
| 10447036       | n-R5s65           | nuclear encoded rRNA 5S 65                                                                            | -2,39       | 0,04    |               |
| 10523134       | Pf4               | platelet factor 4                                                                                     | -2,35       | 0,04    | 56744         |
| 10503218       | Chd7              | chromodomain helicase DNA binding protein 7                                                           | -2,34       | 0,05    | 320790        |
| 10434396       | Abcf3             | ATP-binding cassette, sub-family F (GCN20), member 3                                                  | -2,29       | 0,00    | 27406         |
| 10412900       | Nkiras1           | NFKB inhibitor interacting Ras-like protein 1                                                         | -2,21       | 0,00    | 69721         |
| 10502934       | Rabggtb           | RAB geranylgeranyl transferase, b subunit                                                             | -2,21       | 0,00    | 19352         |
| 10531776       | Fam175a           | family with sequence similarity 175, member A                                                         | -2,10       | 0,00    | 70681         |
| 10548333       | Cd69              | CD69 antigen                                                                                          | -2,08       | 0,00    | 12515         |
| 10457838       | Zfp397os          | zinc finger protein 397 opposite strand                                                               | -2,04       | 0,00    | 328918        |
| 10586250       | Dennd4a           | DENN/MADD domain containing 4A                                                                        | -2,03       | 0,02    | 102442        |

|                 |               |                                                                   |       |      |        |
|-----------------|---------------|-------------------------------------------------------------------|-------|------|--------|
| <b>10546706</b> | Rybp          | RING1 and YY1 binding protein                                     | -2,01 | 0,02 | 56353  |
| <b>10574141</b> | Nlrc5         | NLR family, CARD domain containing 5                              | -1,99 | 0,04 | 434341 |
| <b>10442032</b> | BC002059      | cDNA sequence BC002059, mRNA (cDNA clone MGC:6110 )               | -1,90 | 0,01 | 213811 |
| <b>10410530</b> | Slc6a19       | solute carrier family 6 (neurotransmitter transporter), member 19 | -1,90 | 0,04 | 74338  |
| <b>10542156</b> | Clec2d        | C-type lectin domain family 2, member d                           | -1,89 | 0,00 | 93694  |
| <b>10525487</b> | 4932422M17Rik | RIKEN cDNA 4932422M17 gene                                        | -1,89 | 0,03 | 74366  |
| <b>10522009</b> | Pgm1          | phosphoglucomutase 1                                              | -1,87 | 0,02 | 66681  |
| <b>10515363</b> | Mmachc        | methylmalonic aciduria cblC type, with homocystinuria             | -1,87 | 0,05 | 67096  |
| <b>10443459</b> | Sfrs3         | splicing factor, arginine/serine-rich 3 (SRp20)                   | -1,85 | 0,00 | 20383  |
| <b>10492582</b> | Mir15b        | microRNA 15b                                                      | -1,85 | 0,05 | 387175 |
| <b>10501048</b> | Dennd2d       | DENN/MADD domain containing 2D                                    | -1,84 | 0,02 | 72121  |
