# Supplementary material for: Lymphocyte Gene Expression Signatures from Patients and Mouse Models of Hereditary Hemochromatosis Reveal a Function of HFE as a Negative Regulator of CD8+ T-Lymphocyte Activation and Differentiation In Vivo
Source: PubMed Central journal article supplement (PMC4399836; doi:10.1371/journal.pone.0124246), 2015-04-16
Supplement: pone.0124246.s004.pdf [file pone.0124246.s004.pdf]

**S3 Table: Genes up and down regulated in *Hfe* knockout CD8<sup>+</sup> T lymphocytes in comparison with C57BL/6 mice under high iron diet condition**

| Transcripts ID | Gene abbreviation | Gene name                                                                                             | Fold Change | p-value | Gene ID       |
|----------------|-------------------|-------------------------------------------------------------------------------------------------------|-------------|---------|---------------|
| 10493831       | S100a8            | S100 calcium binding protein A8 (calgranulin A)                                                       | 34,58       | 0,00    | 20201         |
| 10499861       | S100a9            | S100 calcium binding protein A9 (calgranulin B)                                                       | 29,21       | 0,00    | 20202         |
| 10362674       | Rnu3a             | U3A small nuclear RNA                                                                                 | 9,10        | 0,00    | 19850         |
| 10435497       | Stfa2l1           | stefin A2 like 1                                                                                      | 6,49        | 0,05    | 268885        |
| 10436100       | Retnlg            | resistin like gamma                                                                                   | 6,36        | 0,00    | 245195        |
| 10456005       | Cd74              | CD74 antigen (invariant polypeptide of major histocompatibility complex, class II antigen-associated) | 3,71        | 0,05    | 16149         |
| 10551883       | Tyrobp            | TYRO protein tyrosine kinase binding protein                                                          | 3,48        | 0,00    | 22177         |
| 10399428       | Snord118          | small nucleolar RNA, C/D box 118                                                                      | 3,25        | 0,00    | 100216530     |
| 10377429       | Snord118          | small nucleolar RNA, C/D box 118                                                                      | 3,25        | 0,00    | 100216530     |
| 10383756       | Ifitm2            | interferon induced transmembrane protein 2                                                            | 3,18        | 0,01    | 80876         |
| 10569017       | Ifitm3            | interferon induced transmembrane protein 3                                                            | 3,18        | 0,03    | 66141         |
| 10379727       | Gm11428           | predicted gene 11428                                                                                  | 2,89        | 0,02    | 100034251     |
| 10444291       | H2-Ab1            | histocompatibility 2, class II antigen A, beta 1                                                      | 2,77        | 0,03    | 14961         |
| 10551025       | Cd79a             | CD79A antigen (immunoglobulin-associated alpha)                                                       | 2,74        | 0,04    | 12518         |
| 10550509       | Pglyrp1           | peptidoglycan recognition protein 1                                                                   | 2,65        | 0,01    | 21946         |
| 10539577       | Spr               | sepiapterin reductase                                                                                 | 2,60        | 0,04    | 20751         |
| 10583286       | Gpr83             | G protein-coupled receptor 83                                                                         | 2,58        | 0,04    | 14608         |
| 10545014       | Vopp1             | vesicular, overexpressed in cancer, prosurvival protein 1                                             | 2,51        | 0,03    | 232023        |
| 10548333       | Cd69              | CD69 antigen                                                                                          | 2,49        | 0,00    | 12515         |
| 10360070       | Fcer1g            | Fc receptor, IgE, high affinity I, gamma polypeptide                                                  | 2,46        | 0,00    | 14127         |
| 10427908       | Gm9948            | predicted gene 9948                                                                                   | 2,45        | 0,02    | 791293        |
| 10553299       | Ifitm2            | interferon induced transmembrane protein 2                                                            | 2,42        | 0,02    | 80876         |
| 10344799       | Cssp1             | centrosome and spindle pole associated protein 1                                                      | 2,42        | 0,02    | 211660        |
| 10527638       | Alox5ap           | arachidonate 5-lipoxygenase activating protein                                                        | 2,40        | 0,01    | 11690         |
| 10368508       | 2610036L11Rik     | RIKEN cDNA 2610036L11 gene                                                                            | 2,38        | 0,02    | 66311         |
| 10397536       | Gm4005            | predicted gene 4005                                                                                   | 2,37        | 0,02    | 100042747     |
| 10588223       | Anapc13           | anaphase promoting complex subunit 13                                                                 | 2,36        | 0,01    | 69010         |
| 10493820       | S100a6            | S100 calcium binding protein A6 (calcylin)                                                            | 2,36        | 0,00    | 20200         |
| 10364293       | Ube2g2            | ubiquitin-conjugating enzyme E2G 2                                                                    | 2,28        | 0,04    | 22213         |
| 10473250       | Mrpl18            | mitochondrial ribosomal protein L18                                                                   | 2,21        | 0,02    | 67681         |
| 10569014       | Ifitm2            | interferon induced transmembrane protein 2                                                            | 2,21        | 0,01    | 80876         |
| 10437963       | Fam128b           | family with sequence similarity 128, member B                                                         | 2,19        | 0,00    | 72083         |
| 10590298       | Eif1b             | eukaryotic translation initiation factor 1B                                                           | 2,18        | 0,01    | 68969         |
| 10452110       | 2410015M20Rik     | RIKEN cDNA 2410015M20 gene                                                                            | 2,16        | 0,01    | 224904        |
| 10603833       | Usmg5             | upregulated during skeletal muscle growth 5                                                           | 2,14        | 0,02    | 66477         |
| 10542156       | Clec2d            | C-type lectin domain family 2, member d                                                               | 2,14        | 0,01    | 93694         |
| 10392142       | Cd79b             | CD79B antigen                                                                                         | 2,12        | 0,01    | 15985         |
| 10412211       | Gzma              | granzyme A                                                                                            | 2,11        | 0,00    | 14938         |
| 10514466       | Jun               | jun proto-oncogene                                                                                    | 2,11        | 0,01    | 16476         |
| 10575961       | Usp10             | ubiquitin specific peptidase 10                                                                       | 2,10        | 0,01    | 22224         |
| 10356999       | Prdx2             | peroxiredoxin 2                                                                                       | 2,09        | 0,04    | 21672         |
| 10517336       | Clic4             | chloride intracellular channel 4 (mitochondrial)                                                      | 2,08        | 0,02    | 29876         |
| 10440918       | Tmem50b           | transmembrane protein 50B                                                                             | 2,07        | 0,04    | 77975         |
| 10362896       | Cd24a             | CD24a antigen                                                                                         | 2,05        | 0,01    | 12484         |
| 10565081       | Timm17a           | translocase of inner mitochondrial membrane 17a                                                       | 2,03        | 0,00    | 21854         |
| 10576391       | Rab4a             | RAB4A, member RAS oncogene family                                                                     | 1,99        | 0,03    | 19341         |
| 10416950       | Mir18             | microRNA 18                                                                                           | 1,98        | 0,03    | 387135        |
| 10605943       | Pdzd11 Kif4       | PDZ domain containing 11   kinesin family member 4                                                    | 1,97        | 0,01    | 72621   16571 |
| 10604019       | 1810037I17Rik     | RIKEN cDNA 1810037I17 gene                                                                            | 1,97        | 0,05    | 67704         |
| 10574151       | Nlr5              | NLR family, CARD domain containing 5                                                                  | 1,96        | 0,02    | 434341        |
| 10396862       | Actn1 Strm        | actinin, alpha 1   striamin                                                                           | 1,93        | 0,01    | 109711        |
| 10468287       | Usmg5             | upregulated during skeletal muscle growth 5                                                           | 1,92        | 0,03    | 66477         |
| 10414958       | Tcra-V8           | T-cell receptor alpha, variable 8                                                                     | 1,92        | 0,04    | 100043322     |
| 10450814       | Ppp1r11           | protein phosphatase 1, regulatory (inhibitor) subunit 11                                              | 1,91        | 0,05    | 76497         |
| 10487476       | 1500011K16Rik     | RIKEN cDNA 1500011K16 gene                                                                            | 1,91        | 0,01    | 67885         |

|          |                |                                                                                     |       |      |                |
|----------|----------------|-------------------------------------------------------------------------------------|-------|------|----------------|
| 10490221 | Atp5e          | ATP synthase, H+ transporting, mitochondrial F1 complex, epsilon subunit            | 1,91  | 0,02 | 67126          |
| 10371002 | Lsm7           | LSM7 homolog, U6 small nuclear RNA associated ( <i>S. cerevisiae</i> )              | 1,90  | 0,05 | 66094          |
| 10430778 | Phf5a          | PHD finger protein 5A                                                               | 1,90  | 0,03 | 68479          |
| 10345183 | Cdk10          | cyclin-dependent kinase 10                                                          | 1,89  | 0,01 | 234854         |
| 10349648 | Ctse           | cathepsin E                                                                         | 1,88  | 0,04 | 13034          |
| 10603837 | Ndufb11        | NADH dehydrogenase (ubiquinone) 1 beta subcomplex, 11                               | 1,87  | 0,02 | 104130         |
| 10492757 | Plrg1          | pleiotropic regulator 1, PRL1 homolog ( <i>Arabidopsis</i> )                        | 1,87  | 0,02 | 53317          |
| 10416199 | Entpd4         | ectonucleoside triphosphate diphosphohydrolase 4                                    | 1,86  | 0,04 | 67464          |
| 10512901 | Mrpl50         | mitochondrial ribosomal protein L50                                                 | 1,85  | 0,00 | 28028          |
| 10450640 | Mrps18b        | mitochondrial ribosomal protein S18B                                                | 1,85  | 0,00 | 66973          |
| 10449356 | AI413582       | expressed sequence AI413582                                                         | 1,83  | 0,03 | 106672         |
| 10373577 | Ormdl2 Dnajc14 | ORM1-like 2 ( <i>S. cerevisiae</i> )   DnaJ (Hsp40) homolog, subfamily C, member 14 | 1,83  | 0,02 | 66844   74330  |
| 10366043 | Dusp6          | dual specificity phosphatase 6                                                      | 1,81  | 0,04 | 67603          |
| 10548333 | Cd69           | CD69 antigen                                                                        | -2,49 | 0,00 | 12515          |
| 10396862 | Actn1 Strm     | actinin, alpha 1   striamin                                                         | -1,93 | 0,01 | 109711   20904 |
| 10542156 | Clec2d         | C-type lectin domain family 2, member d                                             | -2,14 | 0,01 | 93694          |
| 10345183 | Cdk10          | cyclin-dependent kinase 10                                                          | -1,89 | 0,01 | 234854         |
| 10575961 | Usp10          | ubiquitin specific peptidase 10                                                     | -2,10 | 0,01 | 22224          |
| 10574151 | Nlrc5          | NLR family, CARD domain containing 5                                                | -1,96 | 0,02 | 434341         |
| 10344799 | Cspp1          | centrosome and spindle pole associated protein 1                                    | -2,42 | 0,02 | 211660         |
| 10397536 | Gm4005         | predicted gene 4005                                                                 | -2,37 | 0,02 | 100042747      |
| 10583286 | Gpr83          | G protein-coupled receptor 83                                                       | -2,58 | 0,04 | 14608          |
| 10416950 | Mir18          | microRNA 18                                                                         | -1,98 | 0,03 | 387135         |
| 10416199 | Entpd4         | ectonucleoside triphosphate diphosphohydrolase 4                                    | -1,86 | 0,04 | 67464          |
