# Supplementary material for: Lymphocyte Gene Expression Signatures from Patients and Mouse Models of Hereditary Hemochromatosis Reveal a Function of HFE as a Negative Regulator of CD8+ T-Lymphocyte Activation and Differentiation In Vivo
Source: PubMed Central journal article supplement (PMC4399836; doi:10.1371/journal.pone.0124246), 2015-04-16
Supplement: pone.0124246.s005.pdf [file pone.0124246.s005.pdf]

**S4 Table: Functional categories of the significantly different expressed genes between *Hfe* knockout and wild type**

| Category         | Term                                                             | Count | P value  | Genes                                                                                                                    |
|------------------|------------------------------------------------------------------|-------|----------|--------------------------------------------------------------------------------------------------------------------------|
| <b>Cluster 1</b> |                                                                  |       |          |                                                                                                                          |
| SP_PIR_KEYWORDS  | Immune response                                                  | 8     | 3.41E-07 | Cd79a, Cd74, H2-Ab1, H2-Aa, Pglyrp1, Tnfrsf13c, Cd79b, Faim3                                                             |
| GOTERM_BP_FAT    | Antigen processing and presentation of exogenous peptide antigen | 5     | 9.42E-07 | Cd74, H2-DMb1, Fcer1g, H2-Ab1, H2-Aa                                                                                     |
| GOTERM_BP_FAT    | Positive regulation of leukocyte activation                      | 4     | 1.95E-03 | Cd74, Fcer1g, H2-Aa, Tnfrsf13c                                                                                           |
| <b>Cluster 2</b> |                                                                  |       |          |                                                                                                                          |
| GOTERM_CC_FAT    | Late endosome                                                    | 4     | 2.18E-04 | Cd79a, Cd74, H2-DMb1, H2-Ab1                                                                                             |
| KEGG_PATHWAY     | Intestinal immune network for IgA production                     | 4     | 4.92E-04 | H2-DMb1, H2-Ab1, H2-Aa, Tnfrsf13c                                                                                        |
| KEGG_PATHWAY     | Graft-versus-host disease                                        | 4     | 5.85E-04 | Klra3, H2-DMb1, H2-Ab1, H2-Aa                                                                                            |
| <b>Cluster 3</b> |                                                                  |       |          |                                                                                                                          |
| GOTERM_BP_FAT    | Positive regulation of response to stimulus                      | 6     | 1.02E-04 | Cd79a, Fam175a, Fcer1g, H2-Aa, Tnfrsf13c, Cd79b                                                                          |
| INTERPRO         | Phosphorylated immunoreceptor signaling ITAM                     | 3     | 1.31E-04 | Cd79a, Fcer1g, Cd79b                                                                                                     |
| GOTERM_BP_FAT    | Immune response-activating signal transduction                   | 3     | 6.86E-03 | Cd79a, Fcer1g, Cd79b                                                                                                     |
| GOTERM_BP_FAT    | Immune response-regulating signal transduction                   | 3     | 8.04E-03 | Cd79a, Fcer1g, Cd79b                                                                                                     |
| <b>Cluster 4</b> |                                                                  |       |          |                                                                                                                          |
| GOTERM_BP_FAT    | Immune response                                                  | 11    | 1.83E-07 | Pf4, Cd79a, Cd74, H2-DMb1, Fcer1g, H2-Ab1, H2-Aa, Pglyrp1, Tnfrsf13c, Cd79b, Faim3                                       |
| SP_PIR_KEYWORDS  | disulfide bond                                                   | 17    | 1.50E-04 | Lcn2, Pf4, Klra3, Tyrobp, Cd79a, Lyz2, H2-Ab1, H2-Aa, Pglyrp1, Tnfrsf13c, Cd79b, Faim3, Cd74, Fcer1g, Ly6d, Clec2d, Cd69 |
| SP_PIR_KEYWORDS  | signal                                                           | 16    | 3.59E-03 | Lcn2, Pf4, Tyrobp, Cd79a, H2-DMb1, Lyz2, H2-Ab1, H2-Aa, Pglyrp1, Cd79b, Faim3, Retnlg, Gm11428, Fcer1g, Ly6d, Plbd1      |
| INTERPRO         | IPR007110:Immunoglobulin-like                                    | 5     | 3.44E-02 | Cd79a, H2-DMb1, H2-Ab1, H2-Aa, Cd79b                                                                                     |
| <b>Cluster 5</b> |                                                                  |       |          |                                                                                                                          |
| GOTERM_BP_FAT    | Positive regulation of immune system process                     | 6     | 1.67E-04 | Cd79a, Cd74, Fcer1g, H2-Aa, Tnfrsf13c, Cd79b                                                                             |
| GOTERM_BP_FAT    | GO:0001775~cell activation                                       | 5     | 3.60E-03 | Ms4a1, Pf4, Cd79a, Cd74, Fcer1g                                                                                          |
| GOTERM_BP_FAT    | GO:0045321~leukocyte activation                                  | 4     | 1.86E-02 | Ms4a1, Cd79a, Cd74, Fcer1g                                                                                               |
| <b>Cluster 6</b> |                                                                  |       |          |                                                                                                                          |
| UP_SEQ_FEATURE   | calcium-binding region:2; high affinity                          | 3     | 4.23E-04 | S100a8, S100a4, S100a9                                                                                                   |
| UP_SEQ_FEATURE   | calcium-binding region:1; low affinity                           | 3     | 4.23E-04 | S100a8, S100a4, S100a9                                                                                                   |
| PIR_SUPERFAMILY  | PIRSF002353:S-100 protein                                        | 3     | 4.73E-04 | S100a8, S100a4, S100a9                                                                                                   |
| INTERPRO         | IPR001751:S100/CaBP-9k-type, calcium binding                     | 3     | 1.54E-03 | S100a8, S100a4, S100a9                                                                                                   |
| SP_PIR_KEYWORDS  | EF hand                                                          | 3     | 2.22E-03 | S100a8, S100a4, S100a9                                                                                                   |
| SP_PIR_KEYWORDS  | calcium binding                                                  | 3     | 6.17E-03 | S100a8, S100a4, S100a9                                                                                                   |
| <b>Cluster 7</b> |                                                                  |       |          |                                                                                                                          |
| GOTERM_BP_FAT    | Leukocyte chemotaxis                                             | 3     | 2.30E-03 | Pf4, Fcer1g, S100a9                                                                                                      |
| GOTERM_BP_FAT    | Cell chemotaxis                                                  | 3     | 2.30E-03 | Pf4, Fcer1g, S100a9                                                                                                      |
| GOTERM_BP_FAT    | Chemotaxis                                                       | 4     | 2.8E-03  | Pf4, S100a8, Fcer1g, S100a9                                                                                              |
| GOTERM_BP_FAT    | Locomotory behavior                                              | 5     | 3.09E-03 | Pf4, S100a8, Chd7, Fcer1g, S100a9                                                                                        |
| <b>Cluster 8</b> |                                                                  |       |          |                                                                                                                          |
| GOTERM_BP_FAT    | Defense response                                                 | 6     | 5.11E-03 | Cd74, Fcer1g, Lyz2, H2-Aa, Pglyrp1, Clec2d                                                                               |
| GOTERM_BP_FAT    | Defense response to bacterium                                    | 3     | 3.04E-02 | Fcer1g, Lyz2, Pglyrp1                                                                                                    |
| <b>Cluster 9</b> |                                                                  |       |          |                                                                                                                          |
| GOTERM_MF_FAT    | Carbohydrate binding                                             | 5     | 7.02E-03 | Pf4, Klra3, Pglyrp1, Clec2d, Cd69                                                                                        |
| SP_PIR_KEYWORDS  | Signal-anchor                                                    | 5     | 1.81E-02 | Klra3, Cd74, Tnfrsf13c, Clec2d, Cd69                                                                                     |
| UP_SEQ_FEATURE   | domain:C-type lectin                                             | 3     | 2.21E-02 | Klra3, Clec2d, Cd69                                                                                                      |
| INTERPRO         | IPR018378:C-type lectin, conserved site                          | 3     | 2.82E-02 | Klra3, Clec2d, Cd69                                                                                                      |
| INTERPRO         | IPR001304:C-type lectin                                          | 3     | 3.50E-02 | Klra3, Clec2d, Cd69                                                                                                      |
| INTERPRO         | IPR016186:C-type lectin-like                                     | 3     | 4.01E-02 | Klra3, Clec2d, Cd69                                                                                                      |
| SMART            | SM00034:CLECT                                                    | 3     | 4.16E-02 | Klra3, Clec2d, Cd69                                                                                                      |

The Category column shows the original database/resource from which terms originate. The Term column indicates the enriched terms associated with the gene list. The Count column indicates the number of genes involved in the term. The P value was obtained with the modified Fisher exact test. BP, biological processes; GO, Gene Ontology Term; KEGG, Kyoto Encyclopedia of Genes and Genomes; MF, molecular functions; PIR, Protein Information Resource; UDP, Uridine 5'-diphospho
