# Supplementary material for: Lymphocyte Gene Expression Signatures from Patients and Mouse Models of Hereditary Hemochromatosis Reveal a Function of HFE as a Negative Regulator of CD8+ T-Lymphocyte Activation and Differentiation In Vivo
Source: PubMed Central journal article supplement (PMC4399836; doi:10.1371/journal.pone.0124246), 2015-04-16
Supplement: pone.0124246.s006.pdf [file pone.0124246.s006.pdf]

**S5 Table: Expression levels of iron related genes in CD8<sup>+</sup> T lymphocytes from *Hfe* knockout and wild type C57BL/6 mice.** The relative levels of expression are highlighted by colour grading according to normalized expression values. The significance of the differential expression values is indicated by the *p* value of T-test.

| Gene                   | Protein              | Normal Iron Diet          |         | <i>p</i> value |
|------------------------|----------------------|---------------------------|---------|----------------|
|                        |                      | <i>Hfe</i> <sup>-/-</sup> | C57BL/6 |                |
| <b>Iron storage</b>    |                      |                           |         |                |
| <i>Ftl1</i>            | Ferritin L Chain     |                           |         | ns             |
| <i>FtH</i>             | Ferritin Heavy chain |                           |         | ns             |
| <i>Hmox1</i>           | Heme oxygenase       |                           |         | ns             |
| <b>Iron transport</b>  |                      |                           |         |                |
| <i>Slc25a37</i>        | Mitoferrin           |                           |         | ns             |
| <i>Slc11a2</i>         | Dimetal transporter1 |                           |         | ns             |
| <i>Lcn2</i>            | Lipocalin2           |                           |         | 0.0016         |
| <i>Sfxn2</i>           | Sideroflexin2        |                           |         | ns             |
| <i>Slc40a1</i>         | Ferroportin          |                           |         | ns             |
| <i>Abcg2</i>           | Bcrp                 |                           |         | ns             |
| <b>Receptors</b>       |                      |                           |         |                |
| <i>Tfrc</i>            | Transferrin receptor |                           |         | ns             |
| <i>Lrp1</i>            | LRP/CD91             |                           |         | ns             |
| <b>Regulators</b>      |                      |                           |         |                |
| <i>Smad4</i>           | Smad4                |                           |         | ns             |
| <i>Smad7</i>           | Smad7                |                           |         | ns             |
| <i>Usf2</i>            | Usf2                 |                           |         | ns             |
| <i>Hamp2</i>           | Hepcidin 2           |                           |         | ns             |
| <i>Fxn</i>             | Frataxin             |                           |         | ns             |
| <i>Ireb2</i>           | IRP2                 |                           |         | ns             |
| <i>BMP6</i>            | BMP6                 |                           |         | ns             |
| <i>BMP9</i>            | BMP9                 |                           |         | ns             |
| <i>Hamp1</i>           | Hepcidin 1           |                           |         | ns             |
| <i>Hfe2</i>            | HJV                  |                           |         | ns             |
| <i>Hfe</i>             | HFE                  |                           |         | ns             |
| <b>Oxidoreductases</b> |                      |                           |         |                |
| <i>Cybrd1</i>          | Dcytb                |                           |         | ns             |

- No expression (< 5 normalized gene expression value)
- low expression ([5 a 7] normalized gene expression value)
- medium expression( [7 a 9] normalized gene expression value)
- high expression( >9 normalized gene expression value)
