# Supplementary material for: Lymphocyte Gene Expression Signatures from Patients and Mouse Models of Hereditary Hemochromatosis Reveal a Function of HFE as a Negative Regulator of CD8+ T-Lymphocyte Activation and Differentiation In Vivo
Source: PubMed Central journal article supplement (PMC4399836; doi:10.1371/journal.pone.0124246), 2015-04-16
Supplement: pone.0124246.s007.pdf [file pone.0124246.s007.pdf]

**S6 Table: Sequences of the oligonucleotide primers used for the first and second PCR experiments in CD8 T lymphocytes from HH patients.** Primers on the top: forward primers; Primers on the bottom: reverse primers

| <b>Gene</b>  | <b>Accession number</b> | <b>1<sup>st</sup> PCR primers</b>                           | <b>2<sup>nd</sup> PCR primers</b>                           |
|--------------|-------------------------|-------------------------------------------------------------|-------------------------------------------------------------|
| <b>LEF1</b>  | AF288571                | 5'-ATCCCGAAGAGGAAGGCGATT-3'<br>5'-GCACCACGGGCACTTTATTTG-3'  | 5'-CCGATGACGGAAAGCATCCAG-3'<br>5'-GCACCACGGGCACTTTATTTG-3'  |
| <b>ACTN1</b> | DQ496098                | 5'-TGAAGATGACCCTGGGCATGA-3'<br>5'-CAACGATGTCTTCGGCATCCA-3'  | 5'-GGAAGGATGGCCTCGGCTT-3'<br>5'-CAACGATGTCTTCGGCATCCA-3'    |
| <b>CCR7</b>  | BC035343                | 5'-ACTTCCTCCCCAGACAGGGGT-3'<br>5'-GCCACGAAACAAATGATGGA-3'   | 5'-TGGTGGTGGCTCTCCTTGTC-3'<br>5'-GCCACGAAACAAATGATGGA-3'    |
| <b>NR4A2</b> | BC009288                | 5'-CCCGGTGAGTCTGATCAGTGC-3'<br>5'-CAATCCATTCCCCAAAGCCAC-3'  | 5'-GAGAAGATCCCTGGCTTCGCA-3'<br>5'-CAATCCATTCCCCAAAGCCAC-3'  |
| <b>NAA50</b> | BC012731                | 5'-AGCTGGGAGATGTGACACCACA-3'<br>5'-GCCGACTCATTGCTGATCTGG-3' | 5'-GGCACCTTACCGAAGGCTAGGA-3'<br>5'-GCCGACTCATTGCTGATCTGG-3' |
| <b>P2RY8</b> | NM_178129               | 5'-CCTTTGCAAGGTTGCTGGACA-3'<br>5'-AGAGAAGAGGTTGCCCGGGAT-3'  | 5'-TTCTGCCGCTGCTTCTGCA-3'<br>5'-AGAGAAGAGGTTGCCCGGGAT-3'    |
| <b>FOSL2</b> | NM_005253               | 5'-GCTCAGGCAGTGCATTCATCC-3'<br>5'-TGCAGCCAGCTTGTTCTCTC-3'   | 5'-GCGTGATCAAGACCATTGGCA-3'<br>5'-TGCAGCCAGCTTGTTCTCTC-3'   |
| <b>GAPDH</b> | M33197                  | 5'-GGTCGGAGTCAACGGATTTGG-3'<br>5'-ATGGTGGTGAAGACGCCAGTG-3'  | 5'-CAAATTCATGGCACCGTCAA-3'<br>5'-ATGGTGGTGAAGACGCCAGTG-3'   |
