# Supplementary material for: Lymphocyte Gene Expression Signatures from Patients and Mouse Models of Hereditary Hemochromatosis Reveal a Function of HFE as a Negative Regulator of CD8+ T-Lymphocyte Activation and Differentiation In Vivo
Source: PubMed Central journal article supplement (PMC4399836; doi:10.1371/journal.pone.0124246), 2015-04-16
Supplement: pone.0124246.s008.pdf [file pone.0124246.s008.pdf]

**S7 Table: Sequences of the oligonucleotide primers used for S100a8 and S100a9 expression studies in sorted CD8 from HH patients and controls**

| Gene                  | Primer forward               | Primer reverse             |
|-----------------------|------------------------------|----------------------------|
| <i>18S rRNA</i> human | 5'-CGCCGCTAGAGGTGAAATTC-3'   | 5'-TTGGCAAATGCTTTCGCTC-3'  |
| <i>S100a8</i> human   | 5'-GTCTCTTGTCAGCTGTCTTTCA-3' | 5'-CCTGTAGACGGCATGGAAAT-3' |
| <i>S100a9</i> human   | 5'-GGAATTCAAAGAGCTGGTGC-3'   | 5'-TCAGCATGATGAACTCCTCG-3' |
